# Supplementary material for: Sociodemographic Disparities in Hepatitis C Care Utilization and Testing in the United States: A Nationwide Survey Analysis
Source: Research Square preprint supplement (doi:10.21203/rs.3.rs-6378738/v1), 2025-05-09
Supplement: Supplementary file 1 [file c4b46582f7b480136ff47c4e.docx]

Supplemental Table 1, ICD 9 and ICD 10 codes for hepatitis C, cirrhosis, and substance use

| ICD-9 | | ICD-10 | |
| --- | --- | --- | --- |
| Hepatis C | | | |
| 70.41 | Acute hepatitis C with hepatic coma | B182 | Chronic viral hepatitis C |
| 70.44 | Chronic hepatitis C with hepatic coma | B192 | Unspecified viral hepatitis C |
| 70.51 | Acute hepatitis C without hepatic coma |  |  |
| 70.54 | Chronic hepatitis C without mention of hepatic coma |  |  |
| 70.70 | Unspecified viral hepatitis C without hepatic coma |  |  |
| 70.71 | Unspecified viral hepatitis C with hepatic coma |  |  |
| V02.62 | Hepatitis C carrier |  |  |
| Cirrhosis | | | |
| 571.2 | Alcoholic cirrhosis | K70.3 | Alcoholic cirrhosis of liver |
| 571.5 | Cirrhosis of liver without mention of alcohol | K74.4 | Secondary biliary cirrhosis |
| 572.3 | Portal hypertension | K74.5 | Biliary cirrhosis |
| 456.20 | Esophageal varices | K74.6 | Other and unspecified cirrhosis of liver |
| 567.23 | Spontaneous bacterial peritonitis | C22.0 | Liver cell carcinoma |
| 789.59 | Other ascites | R18.8 | Other ascites |
| 155.0 | Malignant neoplasm of the liver, primary | I85.0 | Esophageal varices |
| 567.7 | Peritonitis and retroperitoneal infections | I85.9 | Esophageal varices without bleeding |
| 572.2 | Hepatic encephalopathy | I86.4 | Gastric varices |
| 572.4 | Hepatorenal syndrome | I98.2 | Esophageal varices without bleeding in diseases classified elsewhere |
|  |  | K65.0 | Generalized (acute) peritonitis |
|  |  | K65.9 | Peritonitis, unspecified |
|  |  | K72.91 | Hepatic failure, unspecified with coma |
| Substance Use | | | |
| Opioid Use | | | |
| 304.0 | Opioid type dependence | F11.1 | Opioid abuse |
| 304.7 | Combinations of opioid type drug with any other drug dependence | F11.2 | Opioid dependence |
| 305.5 | Opioid abuse | F11.9 | Opioid use |
| 965.00 | Poisoning by opium (alkaloids), unspecified | T40.0 | Poisoning by opium |
| 965.01 | Poisoning by heroin | T40.1 | Poisoning by heroin |
| 965.02 | Poisoning by methadone |  |  |
| 965.09 | Poisoning by other opiates and related narcotics |  |  |
| Cocaine Use | | | |
| 304.2 | Cocaine dependence | F14.1 | Cocaine abuse |
| 305.6 | Cocaine abuse | F14.2 | Cocaine dependence |
|  |  | F14.9 | Cocaine use, unspecified |
|  |  | T40.5 | Poisoning by cocaine |
| Amphetamines or Stimulants | | | |
| 304.4 | Amphetamine and other psychostimulant dependence | F15.1 | Other stimulant abuse |
| 305.7 | Amphetamine or related acting sympathomimetic abuse | F15.2 | Other stimulant dependence |
|  |  | F15.9 | Other stimulant use |
| Hallucinogens | | | |
| 304.5 | Hallucinogen dependence | F16.1 | Hallucinogen abuse |
| 305.3 | Hallucinogen abuse | F16.2 | Hallucinogen dependence |
|  |  | F16.9 | Hallucinogen use |
|  |  | T40.8X | Poisoning by lysergide [LSD] |
|  |  | T40.90 | Poisoning by unspecified psychodysleptics |
|  |  | T40.99 | Poisoning by other psychodysleptics |
|  |  |  |  |
| Other drugs or unspecified drug use | | | |
| 305.4 | Sedative, hypnotic or anxiolytic abuse | F13.1 | Sedative, hypnotic or anxiolytic abuse |
| 304.1 | Sedative, hypnotic or anxiolytic dependence | F13.2 | Sedative, hypnotic or anxiolytic dependence |
| 292 | Drug-induced mental disorders | F13.9 | Sedative, hypnotic or anxiolytic use |
| 304.6 | Other specified drug dependence | F19.1 | Other psychoactive substance abuse |
| 304.8 | Combinations of drug dependence excluding opioid type drug | F19.2 | Other psychoactive substance dependence |
| 304.9 | Unspecified drug dependence | F19.9 | Other psychoactive substance use |
| 305.8 | Nondependent antidepressant type abuse | F18.1 | Inhalant abuse |
| 305.9 | Nondependent other mixed or unspecified drug abuse | F18.9 | Inhalant dependence |
| 648.3* | Drug dependence complicating pregnancy childbirth or the puerperium | F55 | Abuse of non-psychoactive substances |
| V65.42 | Counseling on substance use and abuse | O99.32 | Drug use complicating pregnancy, childbirth, and the puerperium |
